# Supplementary material
Source: PubMed Central journal article supplement (PMC1829086)

Fig. 1b

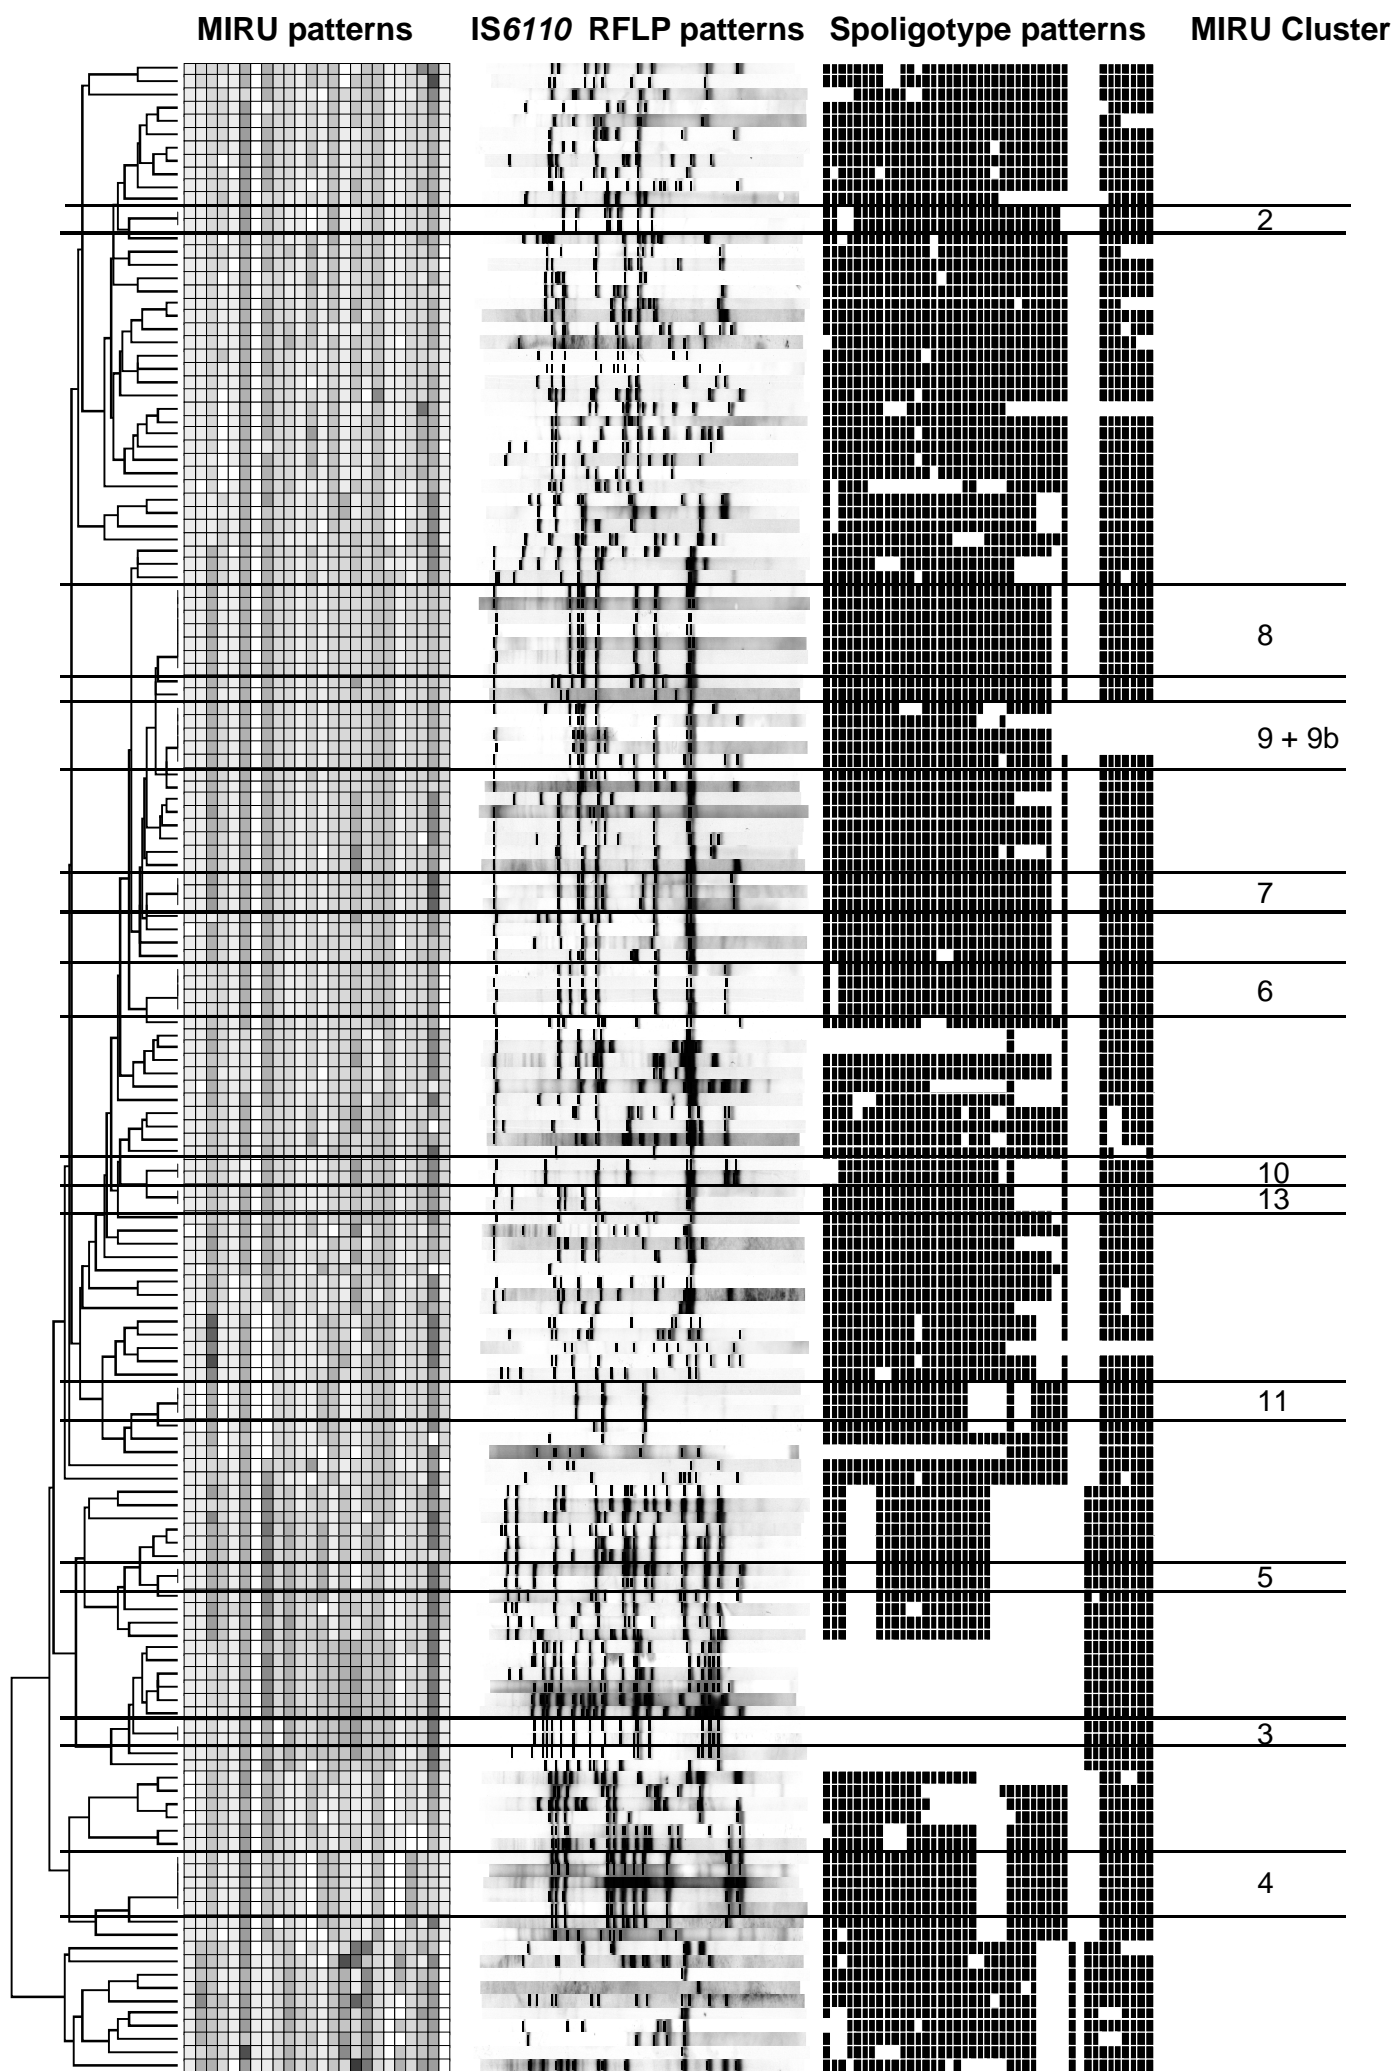

Supplement: jcm_45_3_691__2.pdf [file jcm_45_3_691__2.pdf]
